# Supplementary material for: Oxysterol Compounds in Mouse Mutant αA- and αB-Crystallin Lenses Can Improve the Optical Properties of the Lens
Source: PubMed Central journal article supplement — Invest Ophthalmol Vis Sci. 2022 May 16;63(5):15. doi: 10.1167/iovs.63.5.15 (PMC9123516; doi:10.1167/iovs.63.5.15), 2022-05-16
Supplement: iovs-63-5-15_s001.pdf [file iovs-63-5-15_s001.pdf]

**S1 Table List of All Mice Analysed**

| Mouse ID | Genotype                | Age (days)             | Gender |
|----------|-------------------------|------------------------|--------|
| 1378-3   | WT                      | 255                    | M      |
| 1209-7   |                         | 269                    | M      |
| 1210-3   |                         | 270                    | F      |
| 1211-4   |                         | 270                    | F      |
| 937-4    |                         | 415                    | F      |
| 938-1    |                         | 415                    | M      |
| 1279-3   |                         | 464                    | F      |
| 1076-1   |                         | 493                    | F      |
| 1077-3   |                         | 493                    | F      |
| 1078-4   |                         | 493                    | F      |
| 1079-6   |                         | 493                    | F      |
| 1080-7   |                         | 493                    | F      |
| 1170-5   |                         | 738                    | F      |
| 1235-2   |                         | <i>Cryaa</i> -R49C-Het | 186    |
| 1236-4   | 186                     |                        | F      |
| 1237-7   | 186                     |                        | F      |
| 1238-1   | 186                     |                        | M      |
| 1310-2   | 416                     |                        | M      |
| 1311-5   | 416                     |                        | M      |
| 1144-6   | <i>Cryab</i> -R120G-Het | 402                    | M      |
| 1145-1   |                         | 402                    | F      |
| 1146-3   |                         | 402                    | F      |
| 1226-5   | <i>Cryab</i> -R120G-Hom | 185                    | F      |
| 1231-4   |                         | 185                    | F      |
| 1233-3   |                         | 185                    | M      |
| 1212-1   |                         | 260                    | F      |
| 1213-3   |                         | 260                    | F      |
| 1214-5   |                         | 260                    | F      |
| 1215-2   |                         | 260                    | M      |
| 1216-4   |                         | 260                    | M      |
| 1219-4   |                         | 262                    | F      |
| 1204-2   |                         | 323                    | F      |
| 1150-4   |                         | 380                    | F      |
| 905-3    |                         | 449                    | M      |
| 906-8    |                         | 449                    | M      |

**S2 Table Apparent Cataract Grades for Lenses of Control Mice**

| Mouse ID | Genotype | Age (days) | Gender | Apparent Cataract Grade |          |
|----------|----------|------------|--------|-------------------------|----------|
|          |          |            |        | OS                      | OD       |
| 1378-3   | WT       | 255        | M      | 1                       | 2        |
| 937-4    |          | 415        | F      | 2                       | 2        |
| 938-1    |          | 415        | M      | 2                       | 2        |
| 1279-3   |          | 464        | F      | 4                       | Not done |

|        |                         |     |   |   |   |
|--------|-------------------------|-----|---|---|---|
| 1170-5 |                         | 738 | F | 3 | 2 |
| 1310-2 | <i>Cryaa</i> -R49C-Het  | 416 | M | 3 | 3 |
| 1311-5 |                         | 416 | M | 2 | 3 |
| 905-3  | <i>Cryab</i> -R120G-Hom | 449 | M | 4 | 4 |
| 906-8  |                         | 449 | M | 4 | 4 |
